# Supplementary material for: Ligand-dependent hedgehog signaling maintains an undifferentiated, malignant osteosarcoma phenotype
Source: PubMed Central journal article supplement (PMC10656285; doi:10.1038/s41388-023-02864-7), 2023-10-16

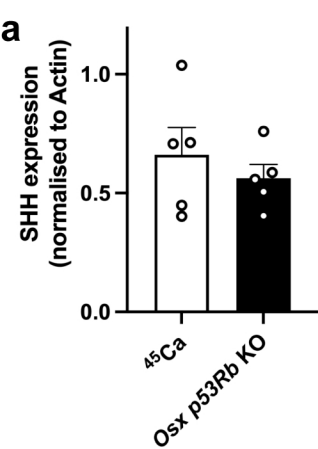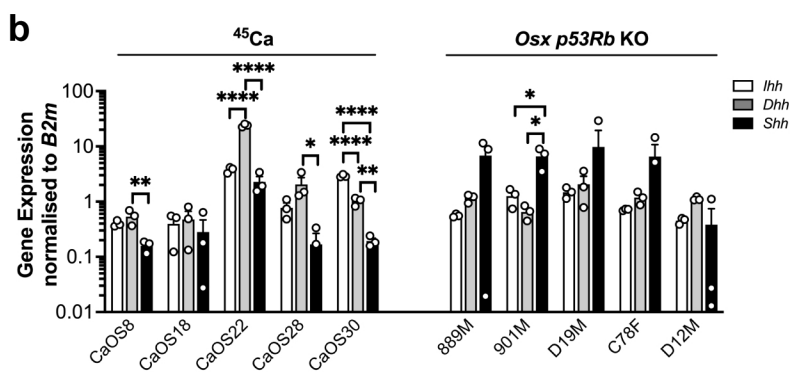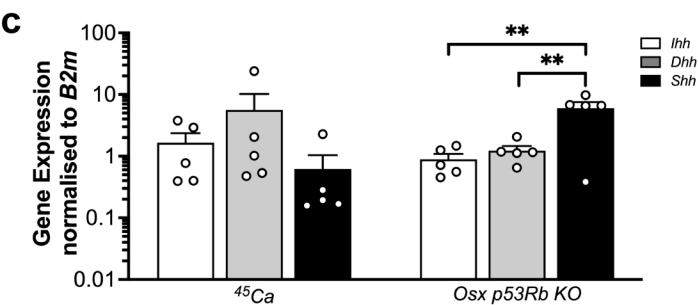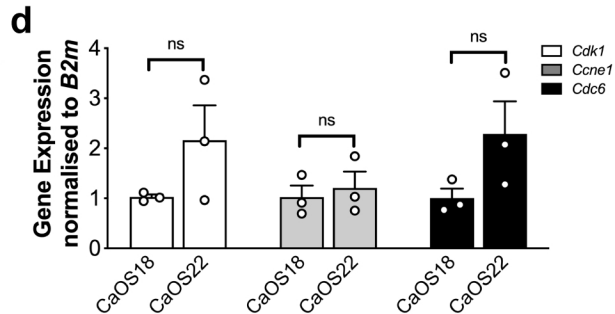

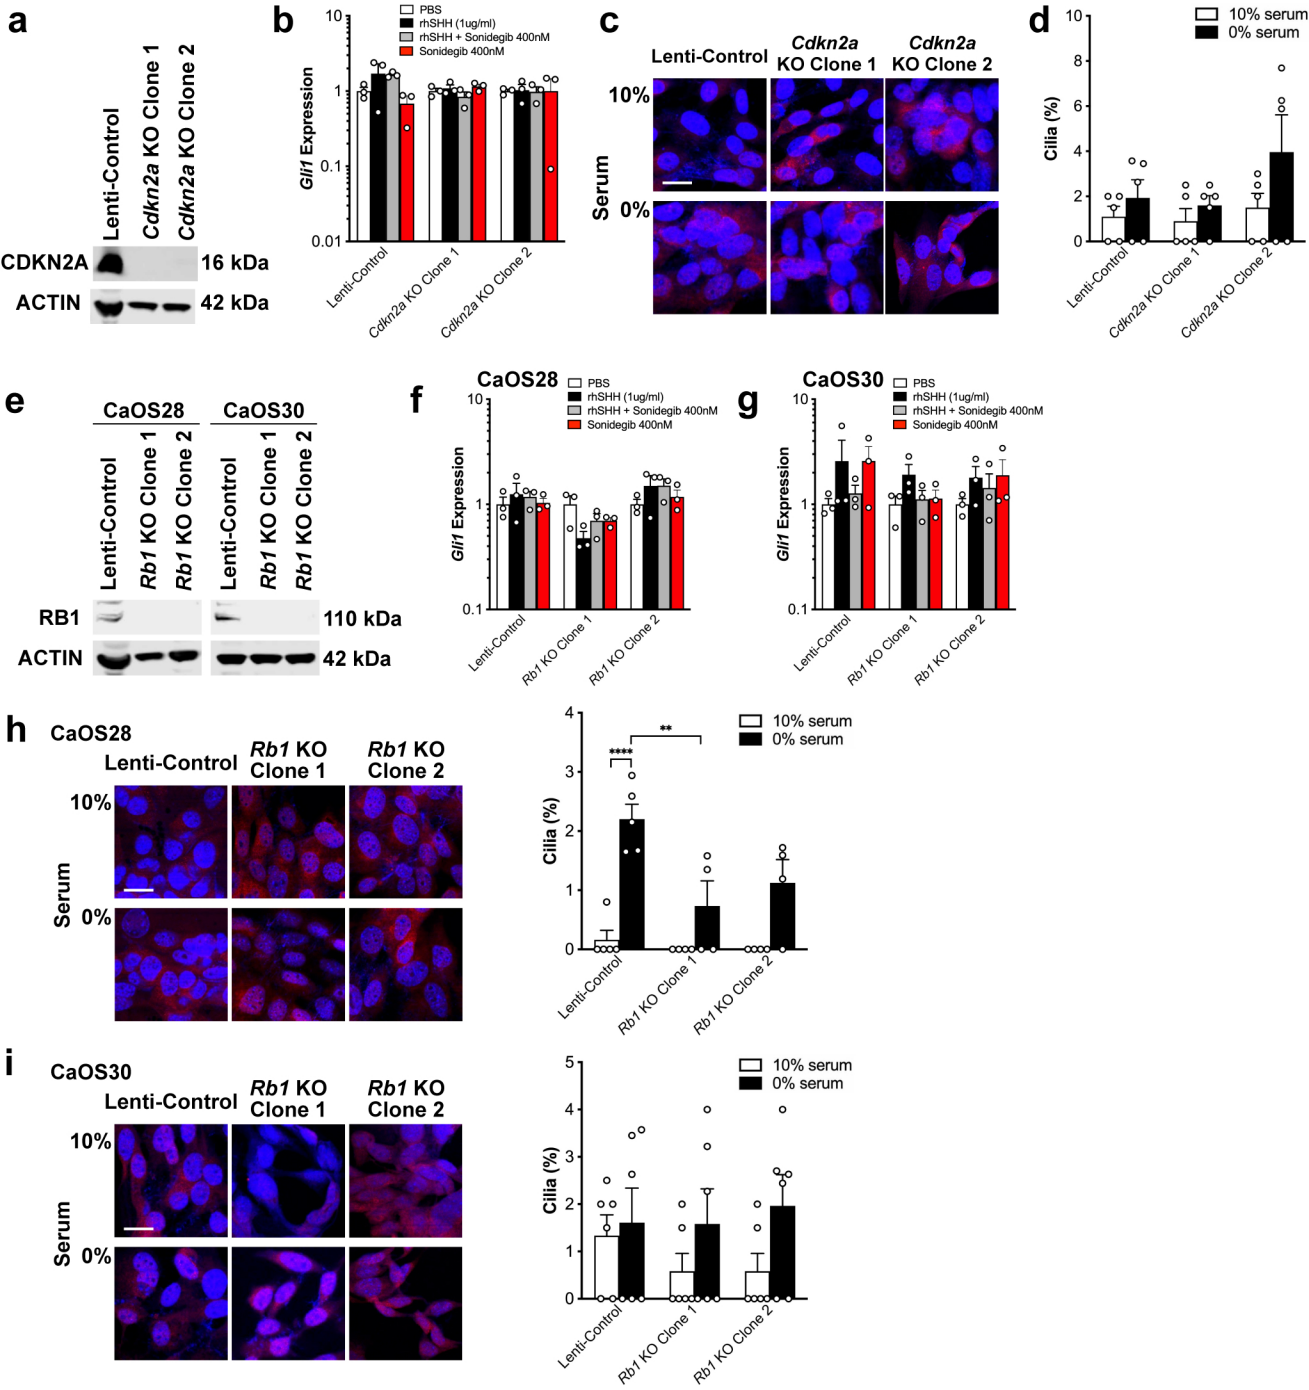

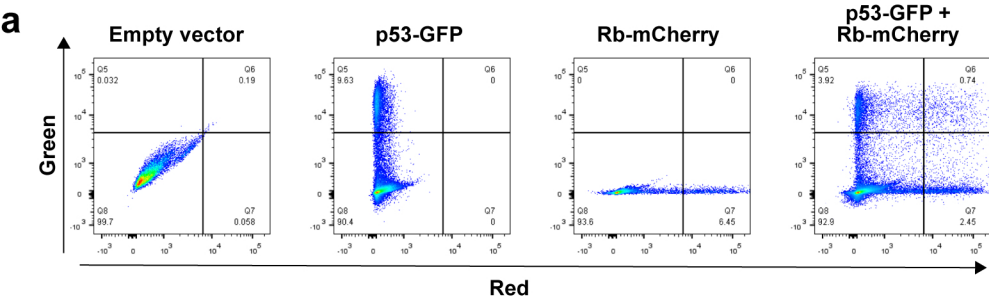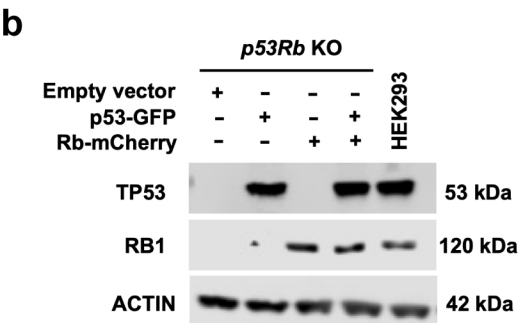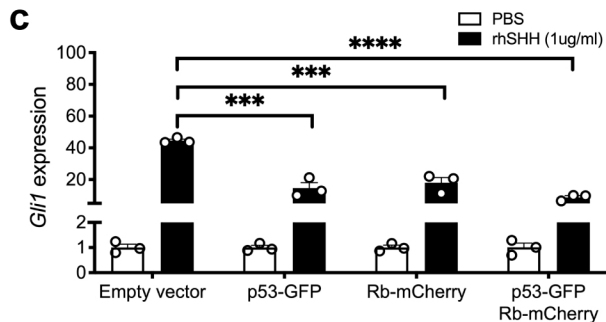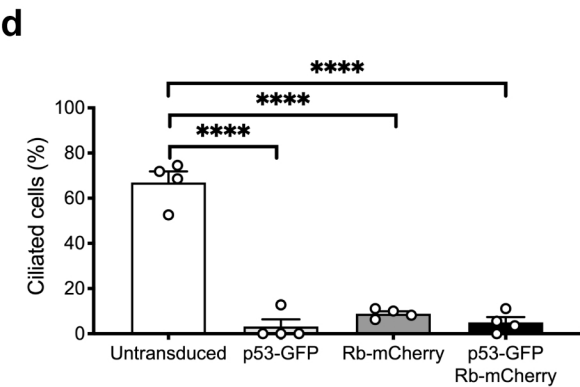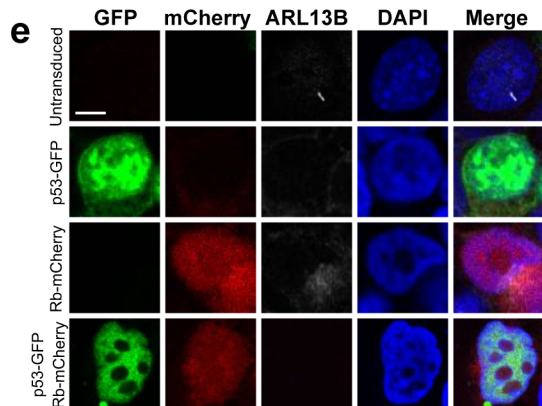

**a**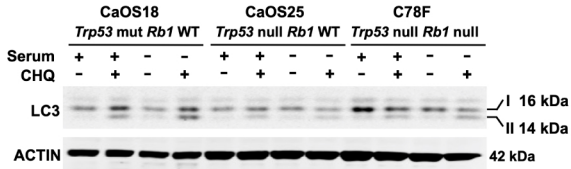**b**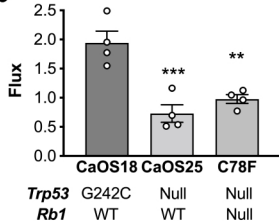

**a**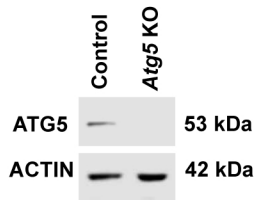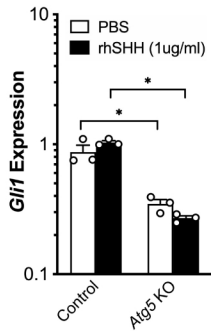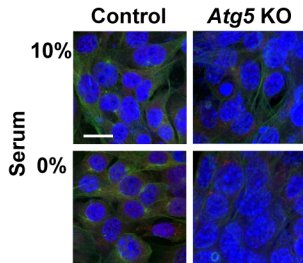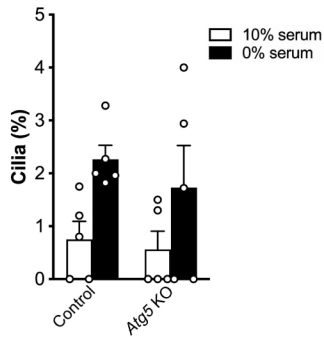**b**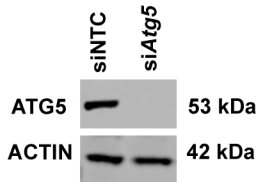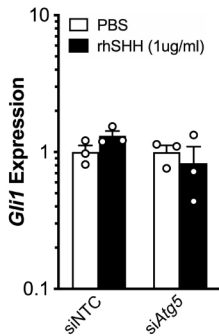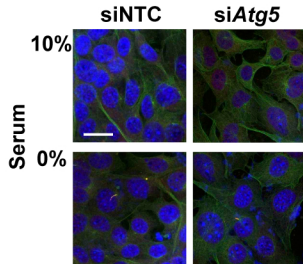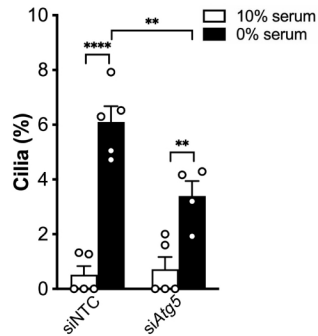

**a**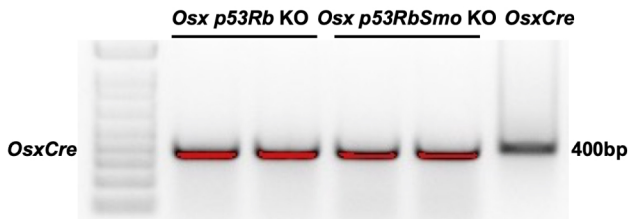**b**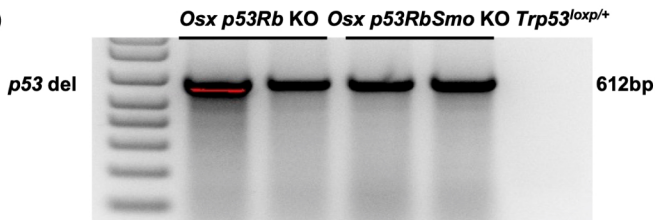**c**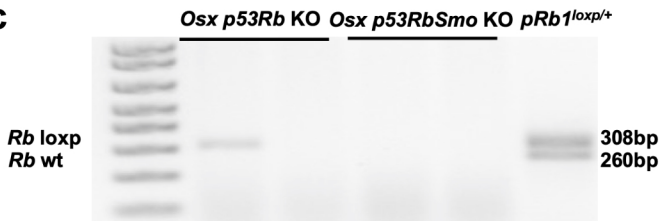**d**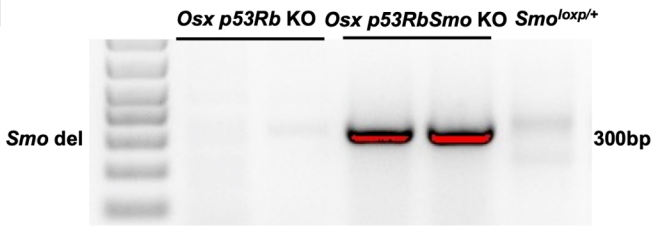

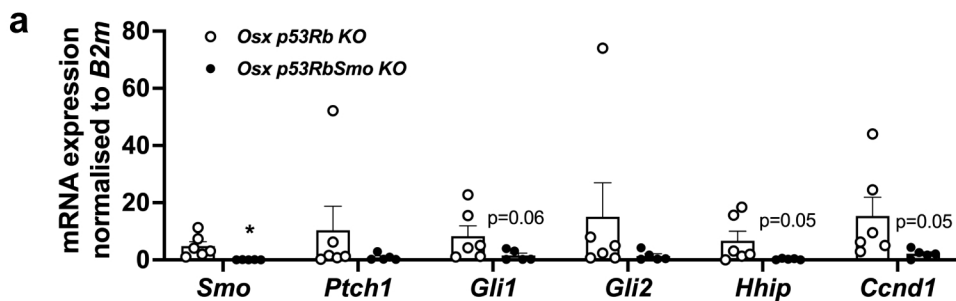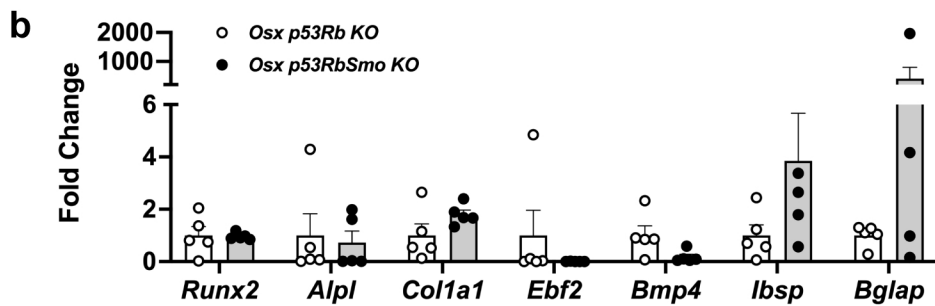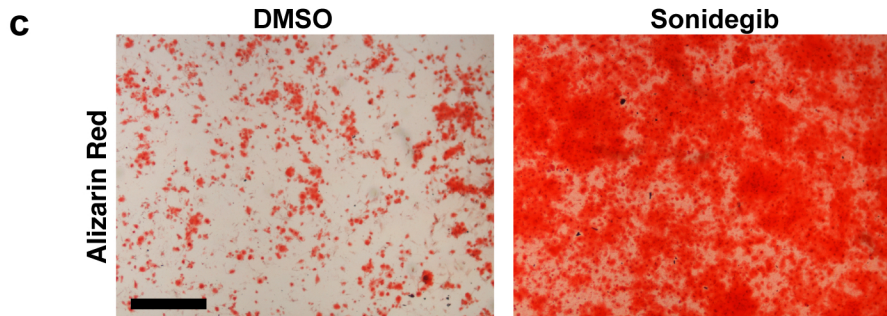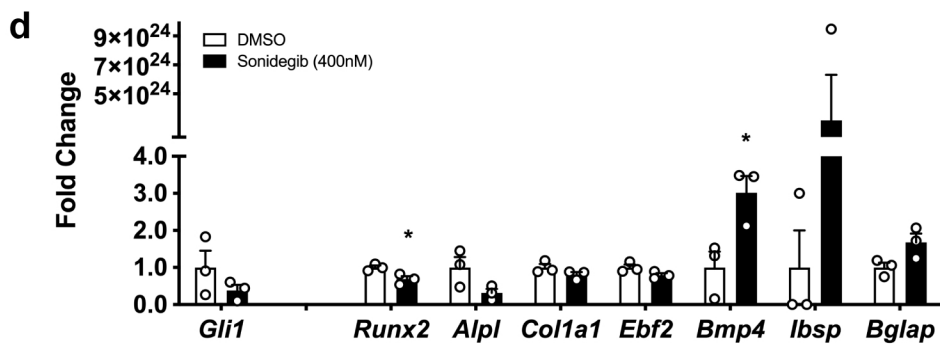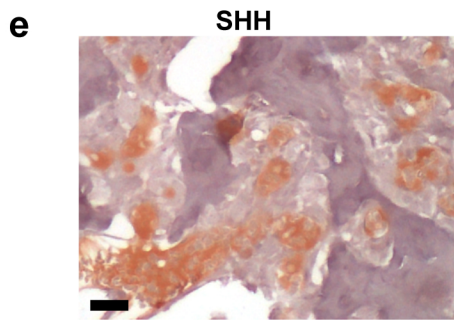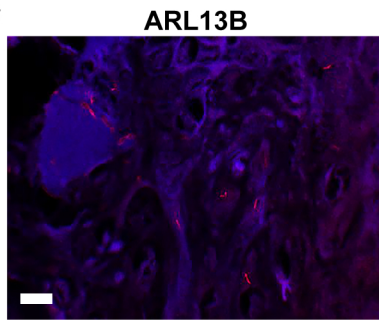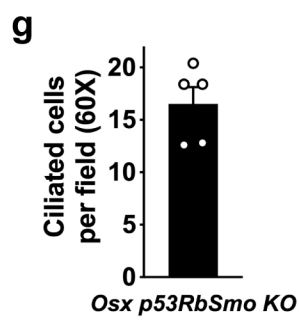

**a**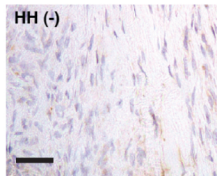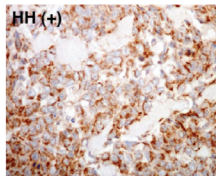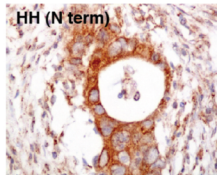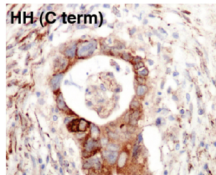**b**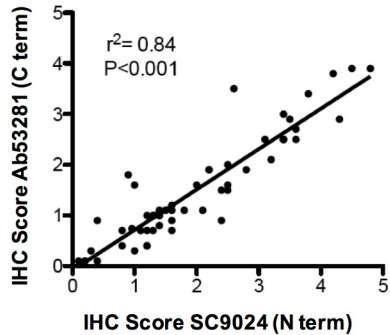**c**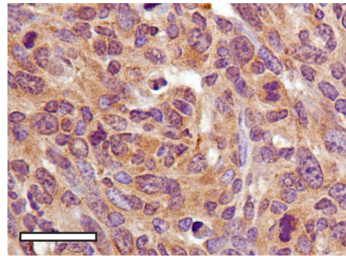



**a**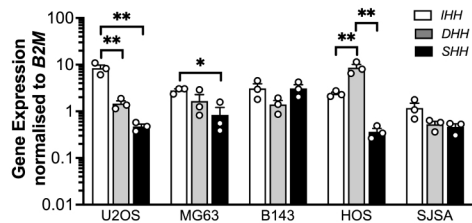**b**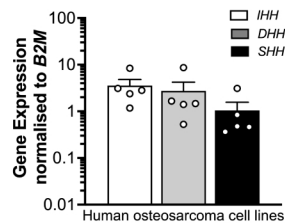**c**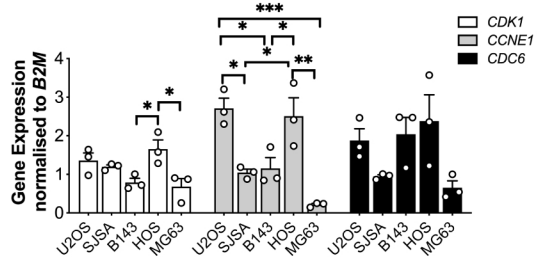**d**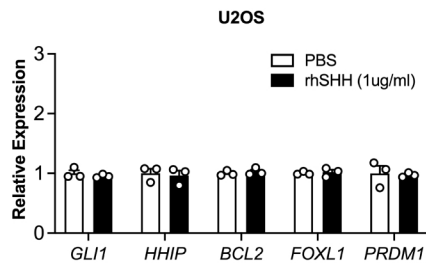**e**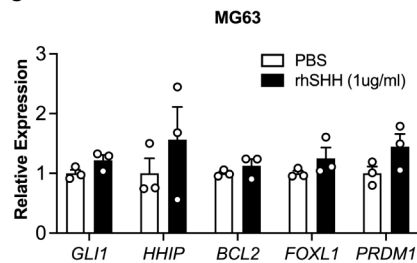**f**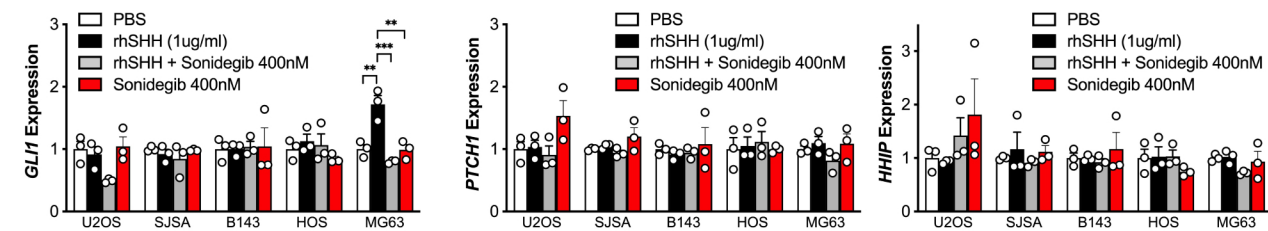**g**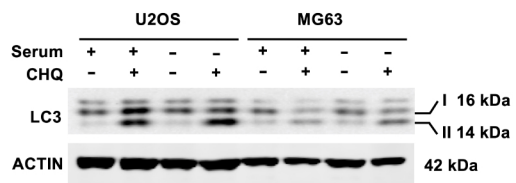**h**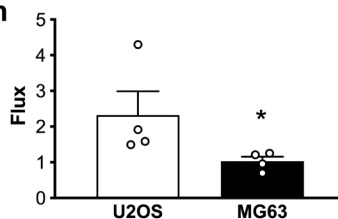

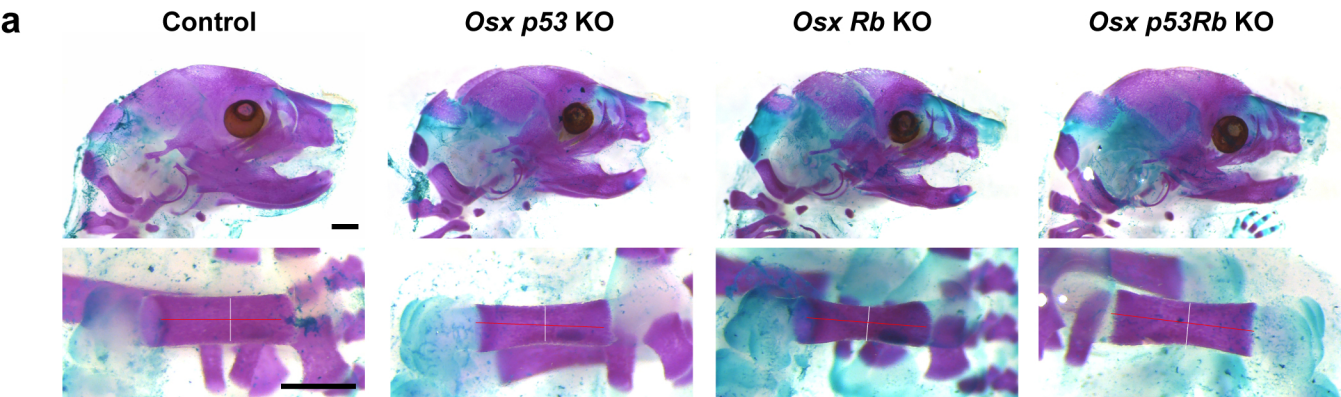

**b**

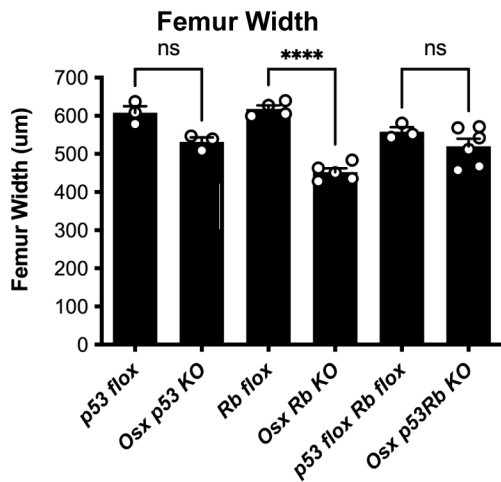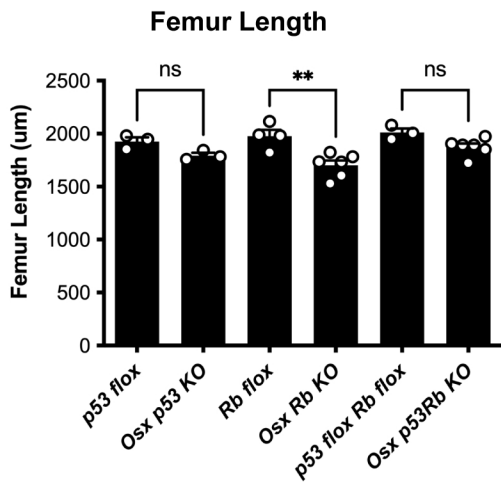

**a****CaOS18**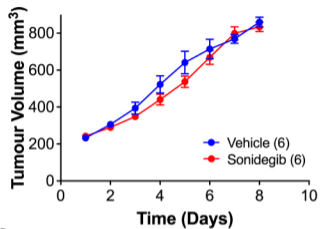**B143**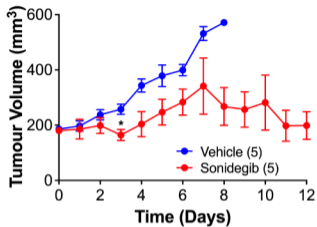**SJSA**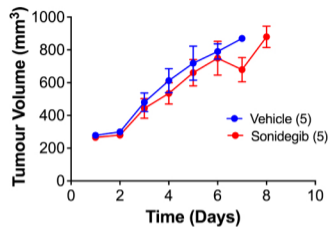**b**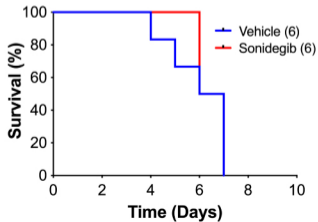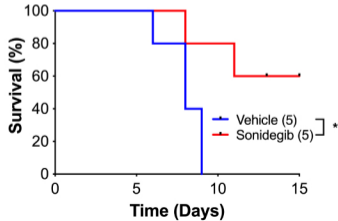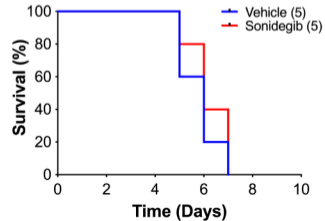

**a**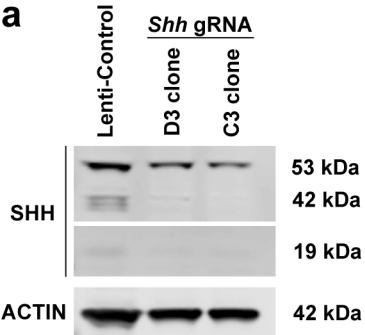**b**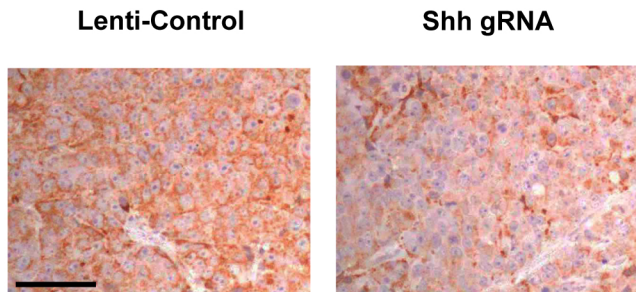**c**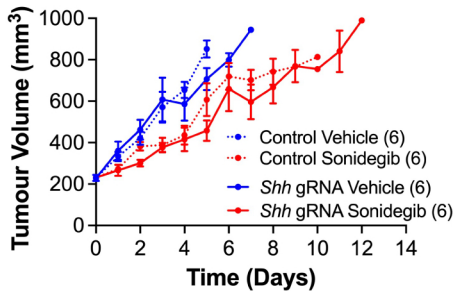**d**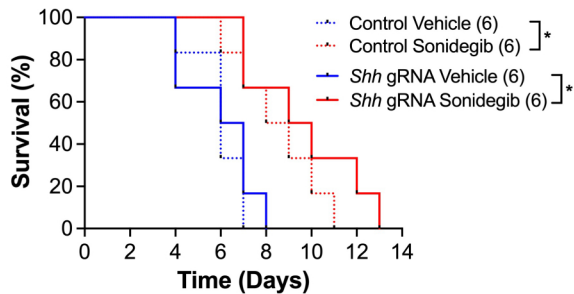

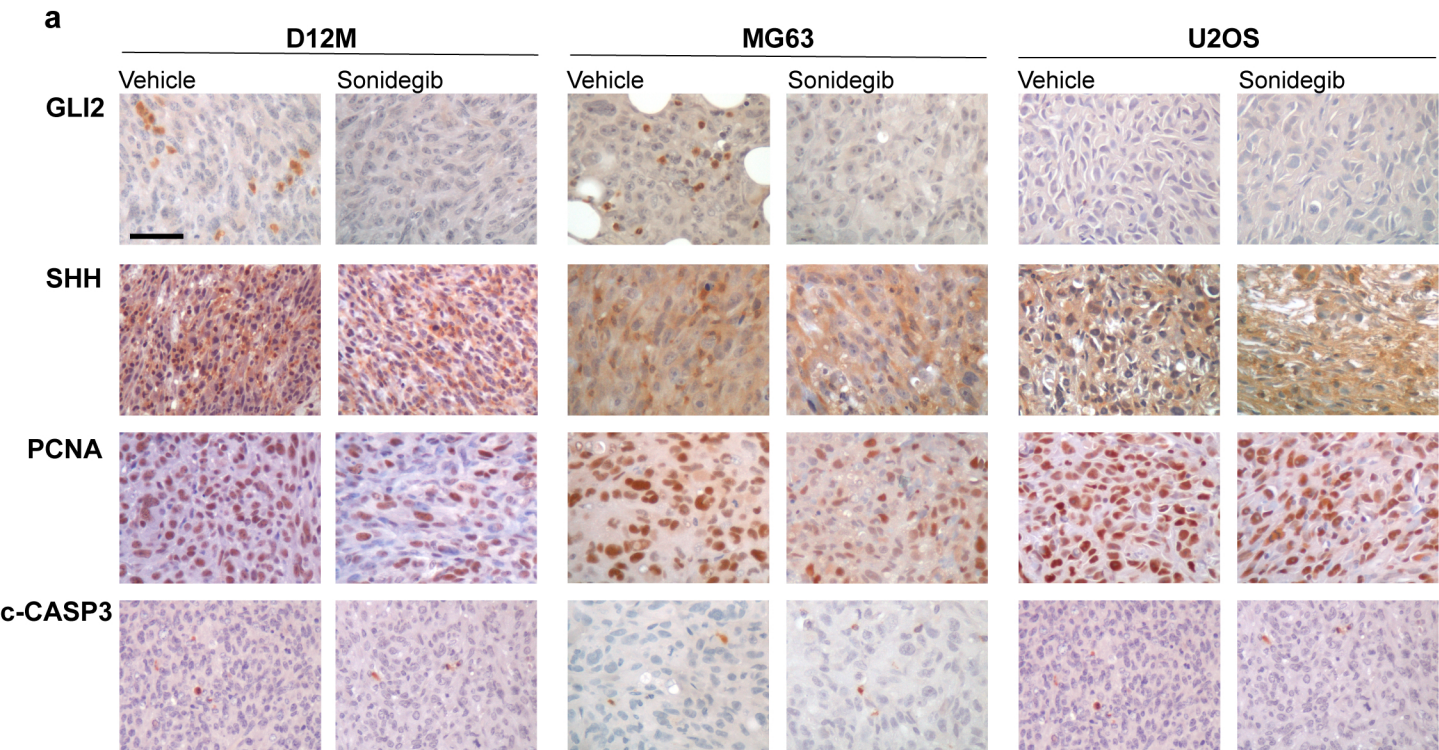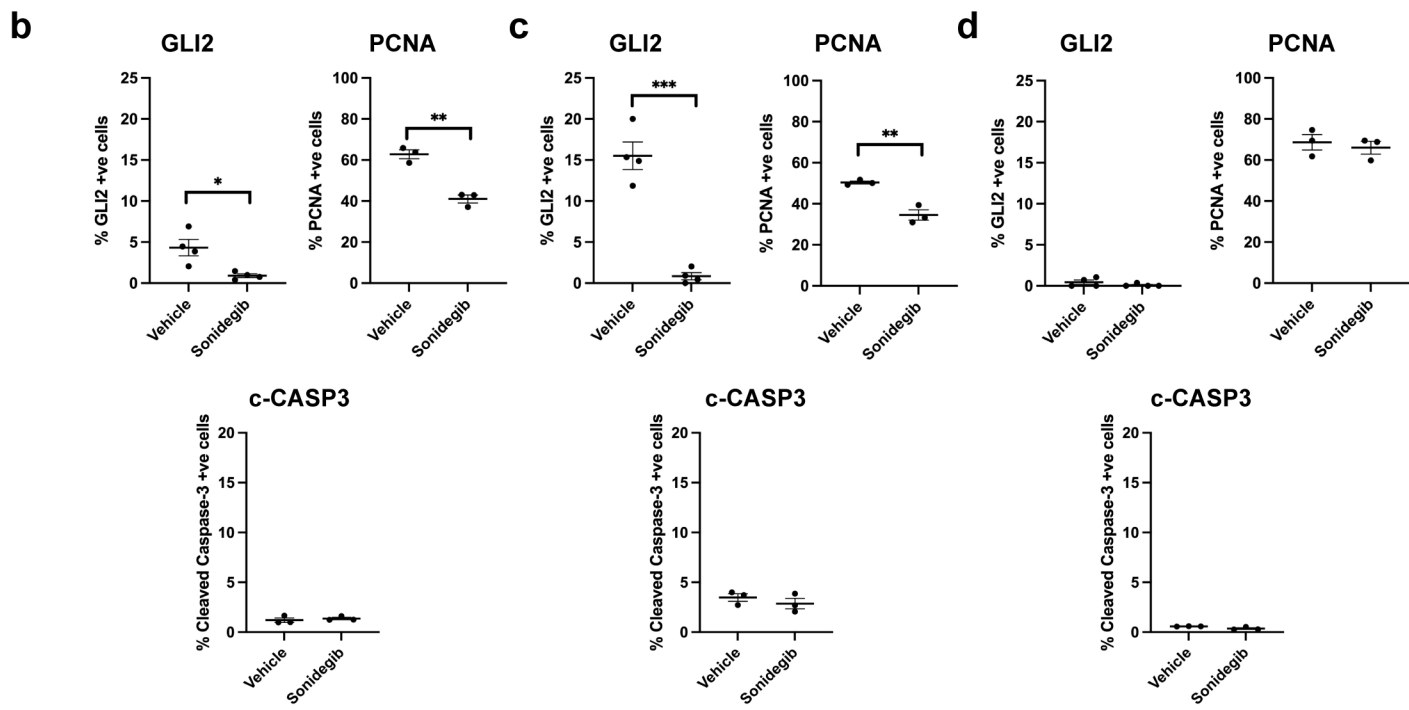

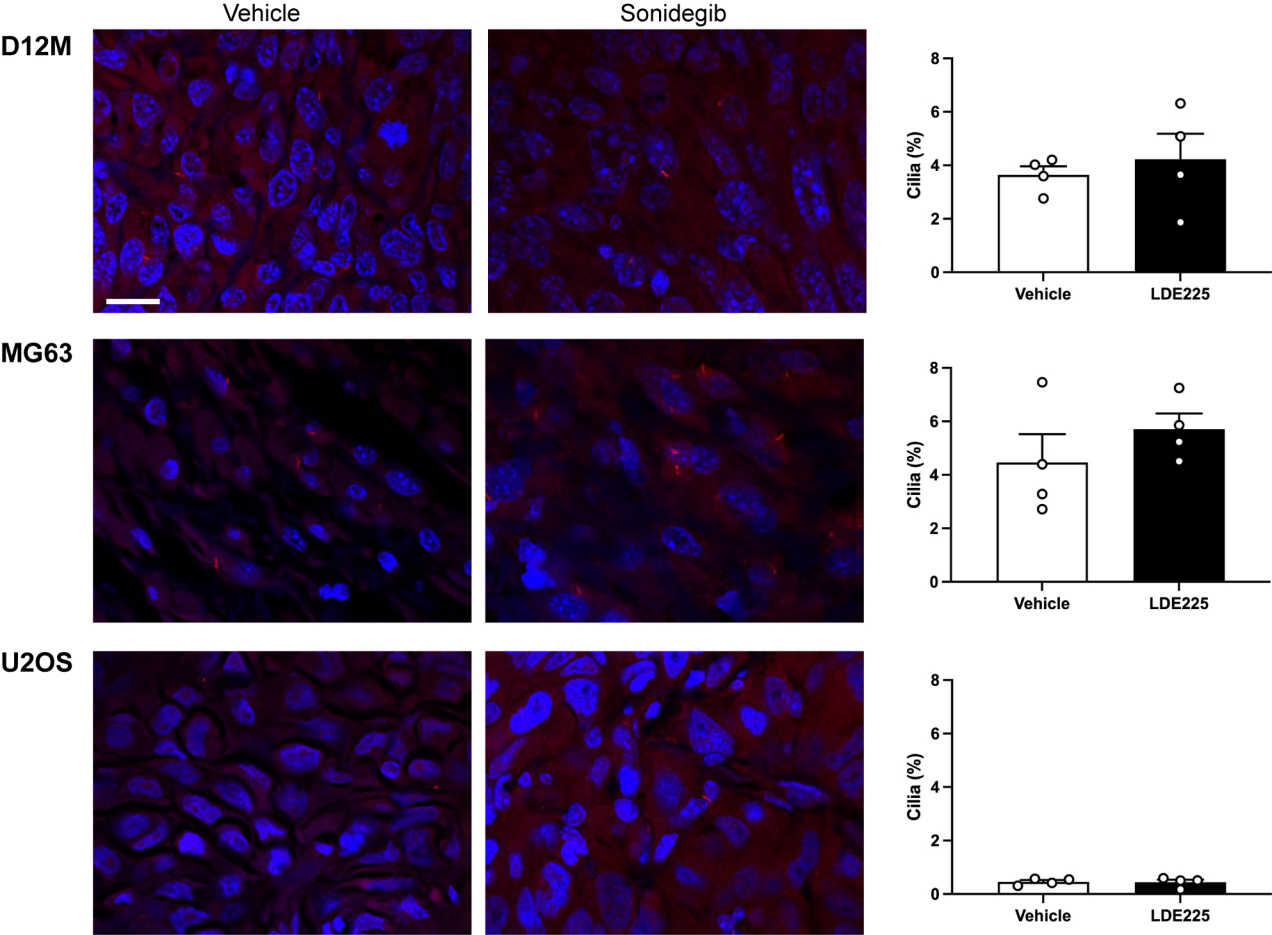

Supplement: 41388_2023_2864_MOESM2_ESM.pdf [file 41388_2023_2864_MOESM2_ESM.pdf]
